# Supplementary material for: Physical health of care-experienced young children in high-income countries: a scoping review protocol
Source: HighWire-hosted journal article supplement (doi:10.1136/bmjopen-2022-063648), 2022-09-01
Supplement: bmjopen-2022-063648supp001_data_supplement.pdf [file bmjopen-2022-063648supp001_data_supplement.pdf]

## A. KEYWORDS

### Care-experienced children

“care experienced child” OR cec OR “looked after child\*” OR lac OR lacyp OR “out of home care” OR “foster\* child\*” OR “foster\* care” OR “foster placement” OR “kinship care\*” OR “substitute care” OR “kith and kin care” OR “friends and family care” OR “adopted child\*” OR orphan\* OR “residential care” OR “group home\*” OR “child\* home” OR “care home” OR “local authority care” OR “corporate parent” OR “child\* protect\*” OR “public care” OR “institution\* care\*” OR “supported living” OR “social care” OR “care placement” OR “child\* welfare” OR “protective custody” OR “state custody”

### Health

health OR healthcare OR medicat\* OR condition\* OR patholog\* OR feeding OR growth OR thriv\* OR stature OR stunting OR immuni\* OR infect\* OR symptom\* OR disease\* OR illness\* OR “well-being” OR wellbeing OR neurodevelop\* OR treatment\* OR prescri\* OR hospital\*

### Age

infan\* OR pre-school OR preschool OR baby OR neonat\* OR “under 6” OR “under six” OR “early intervention” OR birth OR “young child\*” OR toddler

## B. SEARCH STRATEGIES

### MEDLINE via Ovid

Note: Lines beginning with “exp” instruct the database to explode the subject heading to include subsidiary terms.

- 1 exp Child, Foster/
- 2 exp Child, Adopted/
- 3 exp Foster Home Care/
- 4 (“care experienced child\*” OR “looked after child\*” OR lac OR “foster\* child\*” OR “adop\* child\*” OR orphan\*).ab,ti.
- 5 (("out of home" OR foster\* OR "friends and family" OR "kith and kin" OR kinship OR local authorit\* OR institution\* OR substitute) adj1 care).ab,ti.
- 6 ("care home" OR "group home" OR "child\* home").ab,ti.
- 7 ("care placement" OR "foster placement").ab,ti.
- 8 ("corporate parent" OR "child\* protect\*" OR "public care" OR "protective custody" OR "child\* welfare" OR "state custody" OR "supported accommodation" OR "supported living").ab,ti.
- 9 (infan\* OR pre-school OR preschool OR baby OR babies OR neonat\* OR "under 6" OR "under six" OR "early intervention" OR birth OR "young child\*" OR toddler\*).ab,ti.
- 10 exp Child, Preschool/
- 11 (health OR healthcare OR medicat\* OR condition\* OR patholog\* OR feeding OR growth OR thriv\* OR stature OR stunting OR immuni\* OR infect\* OR symptom\* OR disease\* OR illness\* OR "well-being" OR wellbeing OR neurodevelop\* OR treatment\* OR prescri\* OR hospital\*).ab,ti.
- 12 exp Child Development/
- 13 1 OR 2 OR 3 OR 4 OR 5 OR 6 OR 7 OR 8
- 14 9 OR 10
- 15 11 OR 12
- 16 13 AND 14 AND 15

## CINAHL via EBSCOHost

Note: Lines beginning with MH are subject headings/keywords. The "+" operator instructs the database to explode the subject heading to include subsidiary terms.

- S1 MH(Child, Abandoned OR Child, Adopted OR Child, Foster OR Child, Institutionalized OR Foster Home Care)
- S2 TX(care experienced child\* OR looked after child\* OR lac OR foster\* child\* OR adop\* child\* OR orphan\*)
- S3 TX(("out of home" OR foster\* OR "friends and family" OR "kith and kin" OR kinship OR local authorit\* OR institution\* OR substitute) N1 care)
- S4 TX("care home" OR "group home" OR "child\* home")
- S5 TX("care placement" OR "foster placement")
- S6 TX("corporate parent" OR "child\* protect\*" OR "public care" OR "protective custody" OR "child\* welfare" OR "state custody" OR "supported accommodation" OR "supported living")
- S7 MH("Infant+" OR Child, Preschool)
- S8 TX(infan\* OR pre-school OR preschool OR baby OR babies OR neonat\* OR "under 6" OR "under six" OR "early intervention" OR birth OR "young child\*" OR toddler\*)
- S9 MH(Child Health OR Dental Care for Children OR "Child Health Services+")
- S10 TX(health OR healthcare OR medicat\* OR condition\* OR patholog\* OR feeding OR growth OR thriv\* OR stature OR stunting OR immuni\* OR infect\* OR symptom\* OR disease\* OR illness\* OR "well-being" OR wellbeing OR neurodevelop\* OR treatment\* OR prescri\* OR hospital\*)
- S11 S1 OR S2 OR S3 OR S4 OR S5 OR S6
- S12 S7 OR S8
- S13 S9 OR S10
- S14 S11 AND S12 AND S13

## Web of Science Core Collection

- 1 TI=("care experienced child\*" OR "looked after child\*" OR lac OR "foster\* child\*" OR "adop\* child\*" OR orphan\*) OR AB=("care experienced child\*" OR "looked after child\*" OR lac OR "foster\* child\*" OR "adop\* child\*" OR orphan\*)
- 2 TI=((("out of home" OR foster\* OR "friends and family" OR "kith and kin" OR kinship OR "local authorit\*" OR institution\* OR substitute) NEAR/1 care) OR AB=((("out of home" OR foster\* OR "friends and family" OR "kith and kin" OR kinship OR "local authorit\*" OR institution\* OR substitute) NEAR/1 care)
- 3 TI=("care home" OR "group home" OR "child\* home") OR AB=("care home" OR "group home" OR "child\* home")
- 4 TI=("care placement" OR "foster placement") OR AB=("care placement" OR "foster placement")
- 5 TI=("corporate parent" OR "child\* protect\*" OR "public care" OR "protective custody" OR "child\* welfare" OR "state custody" OR "supported accommodation" OR "supported living") OR AB=("corporate parent" OR "child\* protect\*" OR "public care" OR "protective custody" OR "child\* welfare" OR "state custody" OR "supported accommodation" OR "supported living")
- 6 TI=(infan\* OR pre-school OR preschool OR baby OR babies OR neonat\* OR "under 6" OR "under six" OR "early intervention" OR birth OR "young child\*" OR toddler\*) OR AB=(infan\* OR pre-school OR preschool OR baby OR babies OR neonat\* OR "under 6" OR "under six" OR "early intervention" OR birth OR "young child\*" OR toddler\*)
- 7 TI=(health OR healthcare OR medicat\* OR condition\* OR patholog\* OR feeding OR growth OR thiv\* OR stature OR stunting OR immuni\* OR infect\* OR symptom\* OR disease\* OR illness\* OR "well-being" OR wellbeing OR neurodevelop\* OR treatment\* OR prescri\* OR hospital\*) OR AB=(health OR healthcare OR medicat\* OR condition\* OR patholog\* OR feeding OR growth OR thiv\* OR stature OR stunting OR immuni\* OR infect\* OR symptom\* OR disease\* OR illness\* OR "well-being" OR wellbeing OR neurodevelop\* OR treatment\* OR prescri\* OR hospital\*)
- 8 1 OR 2 OR 3 OR 4 OR 5
- 9 6 AND 7 AND 8

## **C. DATA CHARTING VARIABLES**

### **Bibliographic variables**

Article title, authors, year of publication, journal title.

### **Participant demographics and setting**

Age (inc. measure of central tendency/dispersion), gender split, care placement type, country.

### **Study-related variables**

Health outcomes studied, prevalence statistics/statistical methods used, effect sizes (where appropriate), study aims/objectives, study design, sample type(s), no. of care-experienced children in sample, no. of non-care children in control sample (where appropriate), key findings of relevance to review question.
